# Supplementary material
Source: PubMed Central journal article supplement (PMC5953809)
Supplement: NIHMS951141-supplement.pdf [file NIHMS951141-supplement.pdf]

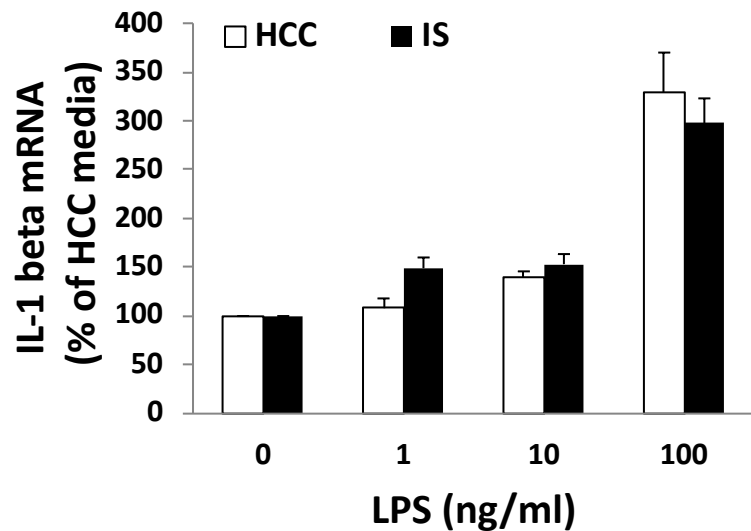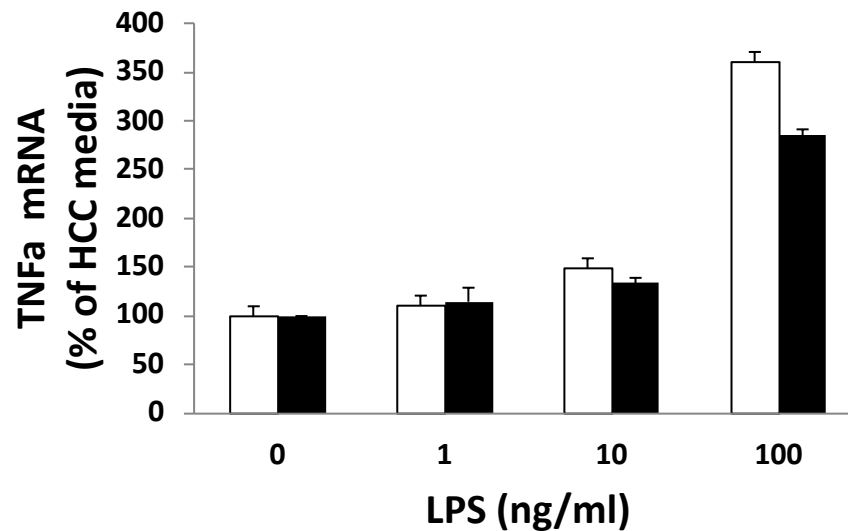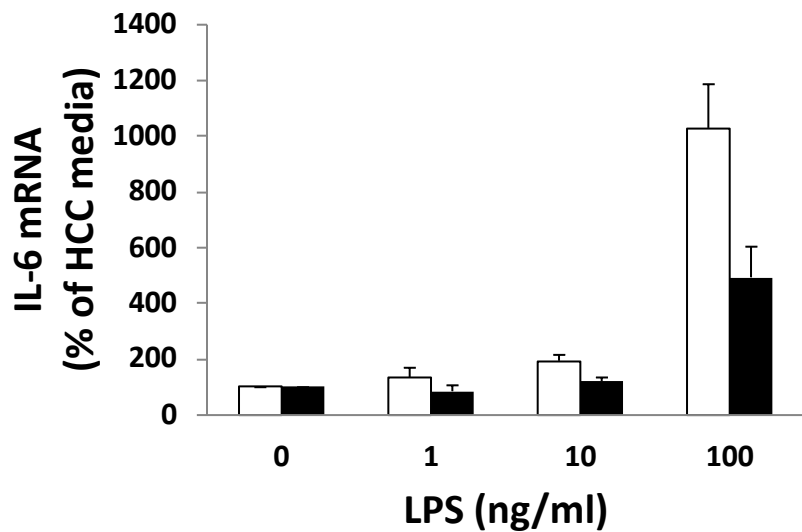

**Supplemental figure 1.** Microglia were isolated from the hippocampus of female rats 24 h following inescapable stress (IS) or home cage treatment (HCC). Cells were plated (10,000 cell per well) with LPS for 4 h prior to isolating RNA. Prior stress did not potentiate *IL-1 $\beta$*  or *TNF $\alpha$*  mRNA expression. Further, prior stress significantly suppressed IL-6 mRNA expression. Results were analyzed using 2 X 4 ANOVA with stress and LPS dose as the independent variables (n = 8 per group).
